# Supplementary material for: Accessing simply-substituted 4-hydroxytetrahydroisoquinolines via Pomeranz–Fritsch–Bobbitt reaction with non-activated and moderately-activated systems
Source: publisher site journal article supplement (doi:10.3762/bjoc.13.182), 2017-09-06
Supplement: Additional file 1 [file 1860-5397-13-182-S1.pdf]

**Supporting Information**  
**for**

**Accessing simply-substituted 4-hydroxytetrahydroisoquinolines via  
Pomeranz–Fritsch–Bobbitt reaction with non-activated and moderately-  
activated systems**

Marco Mottinelli<sup>1,†</sup>, Mathew P. Leese<sup>1</sup> and Barry V. L. Potter<sup>\*1,2</sup>

Address: <sup>1</sup>Wolfson Laboratory of Medicinal Chemistry, Department of Pharmacy and Pharmacology, University of Bath, Claverton Down, BA2 7AY Bath, UK and <sup>2</sup>Drug Discovery & Medicinal Chemistry, Department of Pharmacology, University of Oxford, Mansfield Road, Oxford, OX1 3QT, UK

<sup>†</sup>Present affiliation: Department of Medicinal Chemistry, School of Pharmacy, University of Florida, 1345 Center Drive, Gainesville, Florida, 32611, USA

Email: Barry V. L. Potter\* - barry.potter@pharm.ox.ac.uk

\*Corresponding author

**Synthetic and purification methodologies and spectroscopic data**

**General method for the double reductive amination reaction:** NaBH(OAc)<sub>3</sub> (3.3 g, 15 mmol) was added to a stirring solution of benzaldehyde (1.0 mL, 10 mmol) and aniline (1.1 mL, 12 mmol) in CHCl<sub>3</sub> (60 mL) and the mixture was stirred at rt for one hour. 2,2-Dimethoxyacetaldehyde (30 mmol) was then introduced into the reaction mixture followed by NaBH(OAc)<sub>3</sub> (3.3 g, 15.0 mmol) and the resultant mixture was stirred at rt for further 8 h. The mixture was then quenched with saturated aqueous solution of K<sub>2</sub>CO<sub>3</sub> (60 mL) and the aqueous layer was extracted with CHCl<sub>3</sub> (2 × 30 mL). The combined organics were dried with MgSO<sub>4</sub>, filtered and evaporated to give the crude compound **9a** as a pale yellow oil (3.87 g).

***N*-(2,2-Dimethoxyethyl)-*N*-(4-methoxybenzyl)aniline (**9b**)**

The crude compound was purified by column chromatography (from 0% to 10% EtOAc in pet. ether) to give the product as a yellowish oil (2.09 g, 69%). <sup>1</sup>H NMR (400 MHz, CDCl<sub>3</sub>) δ 3.41 (6H, s, CHOCH<sub>3</sub>), 3.56 (2H, d, *J* = 5.0 Hz, NCH<sub>2</sub>CH), 3.79 (3H, s, ArOCH<sub>3</sub>), 4.60 - 4.65 (3H, m, CH(OCH<sub>3</sub>)<sub>2</sub>, ArCH<sub>2</sub>), 6.61 - 6.73 (1H, m, ArH), 6.76 (2H, d, *J* = 8.3 Hz, ArH), 6.85 (2H, d, *J* = 8.3 Hz, ArH), 7.14 (2H, d, *J* = 8.4 Hz, ArH) and 7.20 (2H, t, *J* = 7.8 Hz, ArH) ppm. <sup>13</sup>C NMR (101 MHz, CDCl<sub>3</sub>) δ 53.7 (NCH<sub>2</sub>CH), 54.3 (ArOCH<sub>3</sub>), 54.6 (CH(OCH<sub>3</sub>)<sub>2</sub>), 55.4 (ArCH<sub>2</sub>), 103.4 (CH(OR)<sub>2</sub>), 112.4 (ArCH), 114.1 (ArCH), 116.6 (ArCH), 127.8 (ArCH), 129.3 (ArCH), 130.7 (ArCCH<sub>2</sub>), 148.7 (ArCN) and 158.6 (ArCOCH<sub>3</sub>) ppm. LC/MS (ES+) *t*<sub>r</sub> = 2.46 min (70%), *m/z* 302.2 (M<sup>+</sup>+H); HRMS (ES+) calcd. for C<sub>18</sub>H<sub>24</sub>NO<sub>3</sub> (M<sup>+</sup>+H) 302.1751, found 302.1761.

***N*-(4-Chlorobenzyl)-*N*-(2,2-dimethoxyethyl)aniline (**9c**)**

The crude compound was purified by column chromatography (eluent: pet. ether) to give a colorless oil (2.73 g, 88%) which showed: <sup>1</sup>H NMR (500 MHz, CDCl<sub>3</sub>) δ 3.40 (6H, s) (2 × OCH<sub>3</sub>), 3.55 (2H, d, *J* = 5.1 Hz) (CHCH<sub>2</sub>), 4.61 (1H, t, *J* = 5.0 Hz) (OCH), 4.62 (2H, s)

(ArCH<sub>2</sub>N), 6.70 (2H, d,  $J$  = 8.9 Hz) (2 x ArCH, aniline), 6.71 (1H, t,  $J$  = 7.3 Hz) (ArCH, aniline), 7.14 (2H, d,  $J$  = 8.6 Hz) (2 x ArCH, benzyl), 7.19 (2H, dd,  $J$  = 7.3, 8.9 Hz) (2 x ArCH, aniline) and 7.26 (2H, d,  $J$  = 8.6 Hz) (2 x ArCH, benzyl) ppm. <sup>13</sup>C NMR (126 MHz, CDCl<sub>3</sub>)  $\delta$  53.9 (CH<sub>2</sub>CH<sub>2</sub>), 54.5 (ArCH<sub>2</sub>), 54.7 (2 x OCH<sub>3</sub>), 103.4 (OCH), 112.4 (2 x ArCH, aniline), 117.0 (ArCH, aniline), 128.0 (ArCH, benzyl), 128.8 (ArCH, benzyl), 129.5 (ArCH, aniline), 132.5 (ArCCl), 137.5 (ArCCH<sub>2</sub>) and 148.4 (ArCN) ppm. LC/MS (ES<sup>+</sup>)  $t_r$  = 3.18 min (97 %),  $m/z$  306.2 (M<sup>+</sup>); (RP, Isocratic, 90% MeOH). HRMS (ES<sup>+</sup>) calcd. for C<sub>17</sub>H<sub>20</sub><sup>35</sup>ClNO<sub>2</sub> (M<sup>+</sup>+H) 306.1255, found 306.1245; calcd. for C<sub>17</sub>H<sub>20</sub><sup>37</sup>ClNO<sub>2</sub> (M<sup>+</sup>+H) 308.1226, found 308.1245.

#### **4-(((2,2-Dimethoxyethyl)(phenyl)amino)methyl)phenol (9d)**

The crude compound was purified by column chromatography (eluent: from 0% to 30% of EtOAc in pet. ether) to give the product as a colorless oil (2.5 g, 90%) which showed: <sup>1</sup>H NMR (500 MHz, CDCl<sub>3</sub>)  $\delta$  3.40 (6H, s, CH<sub>3</sub>), 3.54 (2H, d,  $J$  = 5.1 Hz, CH<sub>2</sub>CH), 4.58 (2H, s, ArCH<sub>2</sub>), 4.61 (1H, t,  $J$  = 5.1 Hz, CH(OR)<sub>2</sub>), 5.01 (1H, bs, OH), 6.70 (1H, t,  $J$  = 7.2 Hz, ArH), 6.74 (2H, d,  $J$  = 8.7 Hz, ArH) 6.74 (2H, d,  $J$  = 8.6 Hz, ArH), 7.06 (2H, d,  $J$  = 8.6 Hz, ArH) and 7.19 (2H, dd,  $J$  = 7.2, 8.7 Hz, ArH) ppm. <sup>13</sup>C NMR (126 MHz, CDCl<sub>3</sub>)  $\delta$  53.6 (CH<sub>2</sub>CH), 54.3 (ArCH<sub>2</sub>), 54.7 (CH<sub>3</sub>), 103.5 (CH(OR)<sub>2</sub>), 112.4 (ArCH), 115.5 (ArCH), 116.7 (ArCH), 128.0 (ArCH), 129.4 (ArCCH<sub>2</sub>), 148.7 (ArCN) and 154.5 (ArCOH) ppm. LC/MS (ES<sup>+</sup>)  $t_r$  = 2.91 min (65 %),  $m/z$  287.5 (M<sup>+</sup>); (RP, Isocratic, 80% MeOH). HRMS (ES<sup>+</sup>) calcd. for C<sub>17</sub>H<sub>22</sub>NO<sub>3</sub> (M<sup>+</sup>+H) 288.1600, found 288.1595; calcd. for C<sub>17</sub>H<sub>21</sub>NNaO<sub>3</sub> (M<sup>+</sup>+Na) 310.1419, found 310.1421.

#### **N-(3-Bromobenzyl)-N-(2,2-dimethoxyethyl)aniline (9e)**

The crude compound was purified by column chromatography (eluent: 0% to 10% EtOAc in pet. ether) to give the product as a colorless oil (1.9 g, 54%) which showed: <sup>1</sup>H NMR

(400 MHz, CDCl<sub>3</sub>)  $\delta$  3.48 (6H, s, CHOCH<sub>3</sub>), 3.65 (2H, d,  $J$  = 5.1 Hz, NCH<sub>2</sub>CH), 3.84 (3H, s, ArOCH<sub>3</sub>), 4.66 - 4.75 (3H, m, ArCH<sub>2</sub>, CH(OR)<sub>2</sub>), 6.67 - 6.92 (6H, m, ArH) and 7.21 - 7.35 (3H, m, ArH) ppm. <sup>13</sup>C NMR (101 MHz, CDCl<sub>3</sub>)  $\delta$  53.9 (NCH<sub>2</sub>CH), 54.6 (CH(OCH<sub>3</sub>)<sub>2</sub>), 54.9 (ArOCH<sub>3</sub>), 55.3 (ArCH<sub>2</sub>N), 103.4 (CH(OR)<sub>2</sub>), 112.0 (ArCH), 112.3 (ArCH), 112.4 (ArCH), 116.7 (ArCH), 118.9 (ArCH), 129.3 (ArCH), 129.7 (ArCH), 140.8 (ArCCH<sub>2</sub>), 148.6 (ArCN) and 160.0 (ArCOCH<sub>3</sub>) ppm. LC/MS (ES<sup>+</sup>)  $t_r$  = 2.51 min (98 %),  $m/z$  302.2 (M<sup>+</sup>+H); (RP, Isocratic, 90% MeOH). HRMS (ES<sup>+</sup>) calcd. for C<sub>18</sub>H<sub>24</sub>NO<sub>3</sub> (M<sup>+</sup>+H) 302.1751, found 302.1739.

#### ***N*-(2,2-Dimethoxyethyl)-*N*-(3-methoxybenzyl)aniline (9f)**

The crude product was purified by column chromatography (from 0% to 10% EtOAc in pet. ether 40-60 °C) to give the product as a pale yellow oil (3.56 g, 79 %) which showed: <sup>1</sup>H NMR (400 MHz, CDCl<sub>3</sub>)  $\delta$  3.48 (6H, s, CHOCH<sub>3</sub>), 3.65 (2H, d,  $J$  = 5.1 Hz, NCH<sub>2</sub>CH), 3.84 (3H, s, ArOCH<sub>3</sub>), 4.66 - 4.75 (3H, m, ArCH<sub>2</sub>, CH(OR)<sub>2</sub>), 6.67 - 6.92 (6H, m, ArH) and 7.21 - 7.35 (3H, m, ArH) ppm. <sup>13</sup>C NMR (101 MHz, CDCl<sub>3</sub>)  $\delta$  53.86 (NCH<sub>2</sub>CH), 54.60 (CH(OCH<sub>3</sub>)<sub>2</sub>), 54.93 (ArOCH<sub>3</sub>), 55.27 (ArCH<sub>2</sub>N), 103.38 (CH(OR)<sub>2</sub>), 112.0 (ArCH), 112.3 (ArCH), 112.4 (ArCH), 116.7 (ArCH), 118.9 (ArCH), 129.3 (ArCH), 129.7 (ArCH), 140.8 (ArCCH<sub>2</sub>), 148.6 (ArCN) and 160.0 (ArCOCH<sub>3</sub>) ppm. LC/MS (ES<sup>+</sup>)  $t_r$  = 2.51 min (98 %),  $m/z$  302.2 (M<sup>+</sup>+H); (RP, Isocratic, 90% MeOH). HRMS (ES<sup>+</sup>) calcd. for C<sub>18</sub>H<sub>24</sub>NO<sub>3</sub> (M<sup>+</sup>+H) 302.1751, found 302.1739.

#### **4-Chloro-*N*-(2,2-dimethoxyethyl)-*N*-(3-methoxybenzyl)aniline (9g)**

The crude compound was purified by column chromatography (eluent: from 0% to 20% EtOAc in pet. ether) to give the product as a pale yellow oil (9.08 g, 90%) which showed: <sup>1</sup>H NMR (500 MHz, CDCl<sub>3</sub>)  $\delta$  3.40 (6H, s, CH(OCH<sub>3</sub>)<sub>2</sub>), 3.54 (2H, d,  $J$  = 5.1 Hz, CHCH<sub>2</sub>), 3.76 (3H, s, ArOCH<sub>3</sub>), 4.58 (1H, t,  $J$  = 5.1 Hz, CHCH<sub>2</sub>), 4.60 (2H, s, ArCH<sub>2</sub>N), 6.63 (2H, d,

$J = 9.2$  Hz, ArH, aniline), 6.71 – 6.74 (1H, m, ArH, benzyl), 6.74 – 6.80 (2H, m, ArH, benzyl), 7.10 (2H, d,  $J = 9.2$  Hz, ArH, aniline) and 7.22 (1H, t,  $J = 7.9$  Hz, ArH, benzyl) ppm.  $^{13}\text{C}$  NMR (126 MHz,  $\text{CDCl}_3$ )  $\delta$  54.2 ( $\text{CHCH}_2$ ), 54.7 ( $\text{CH}(\text{OCH}_3)_2$ ), 55.1 ( $\text{ArCH}_2\text{N}$ ), 55.3 ( $\text{ArOCH}_3$ ), 103.3 ( $\text{CH}(\text{OCH}_3)_2$ ), 112.0 (ArCH, benzyl), 112.4 (ArCH, benzyl), 113.6 (ArCH, aniline), 118.8 (ArCH, benzyl), 121.6 (ArCCl), 129.1 (ArCH, aniline), 129.8 (ArCH, benzyl), 140.2 ( $\text{ArCCH}_2$ ), 147.2 (ArCN) and 160.1 (ArCO) ppm. LC/MS ( $\text{ES}^+$ )  $t_r = 2.91$  min (98 %),  $m/z$  336.0 ( $\text{M}^+ + \text{H}$ ); (RP, Isocratic, 90% MeOH). HRMS ( $\text{ES}^+$ ) calcd.  $\text{C}_{18}\text{H}_{23}^{35}\text{ClNO}_3$  ( $\text{M}^+ + \text{H}$ ) 336.1361, found 336.1353; calcd.  $\text{C}_{18}\text{H}_{23}^{37}\text{ClNO}_3$  ( $\text{M}^+ + \text{H}$ ) 338.1331, found 338.1353

#### 4-(((2,2-Dimethoxyethyl)(*p*-tolyl)amino)methyl)phenol (9i)

The crude compound was purified by column chromatography (eluent: from 0% to 30% EtOAc in pet. ether) to give the product as a colorless oil (2.83 g, 94%) which showed:  $^1\text{H}$  NMR (500 MHz,  $\text{CDCl}_3$ )  $\delta$  2.24 (3H, s,  $\text{ArCH}_3$ ), 3.40 (6H, s,  $\text{CH}(\text{OCH}_3)_2$ ), 3.51 (2H, d,  $J = 5.1$  Hz,  $\text{CH}_2\text{CH}$ ), 4.54 (2H, s,  $\text{ArCH}_2$ ), 4.59 (1H, t,  $J = 5.1$  Hz,  $\text{CH}(\text{OR})_2$ ), 5.10 (1H, bs, OH), 6.66 (2H, d,  $J = 8.6$  Hz, ArH), 6.74 (2H, d,  $J = 8.7$  Hz, ArH), 7.00 (2H, d,  $J = 8.6$  Hz, ArH) and 7.06 (2H, d,  $J = 8.7$  Hz, ArH) ppm.  $^{13}\text{C}$  NMR (126 MHz,  $\text{CDCl}_3$ )  $\delta$  20.1 ( $\text{ArCH}_3$ ), 53.7 ( $\text{CH}_2\text{CH}$ ), 54.4 ( $\text{ArCH}_2$ ), 54.5 ( $\text{CH}(\text{OCH}_3)_2$ ), 103.4 ( $\text{CH}(\text{OR})_2$ ), 112.5 (ArCH), 115.3 (ArCH), 125.7 ( $\text{ArCCH}_3$ ), 127.9 (ArCH), 129.7 (ArCH), 130.8 ( $\text{ArCCH}_2$ ), 146.5 (ArCN) and 154.4 (ArCOH) ppm. LC/MS ( $\text{ES}^+$ )  $t_r = 1.92$  min (>99 %),  $m/z$  301.5 ( $\text{M}^+$ ); (RP, Isocratic, 90% MeOH). HRMS ( $\text{ES}^+$ ) calcd. for  $\text{C}_{18}\text{H}_{24}\text{NO}_3$  ( $\text{M}^+ + \text{H}$ ) 302.1751, found 302.1757.

#### 4-(((2,2-dimethoxyethyl)(4-methoxyphenyl)amino)methyl)phenol (9j)

The crude compound was purified by column chromatography (eluent 0% to 40% EtOAc in pet. ether) to give the product as a colorless oil (2.87 g, 90%) which showed:  $^1\text{H}$  NMR (500 MHz,  $\text{CDCl}_3$ )  $\delta$  3.38 (6H, s,  $\text{CH}(\text{OCH}_3)_2$ ), 3.46 (2H, d,  $J = 5.1$  Hz,  $\text{CH}_2\text{CH}$ ), 3.74 (3H, s,

ArOCH<sub>3</sub>), 4.48 (2H, s, ArCH<sub>2</sub>), 4.55 (1H, t,  $J = 5.1$  Hz, CH(OR)<sub>2</sub>), 5.12 (1H, bs, OH), 6.71 (2H, d,  $J = 9.1$  Hz, ArH), 6.74 (2H, d,  $J = 8.6$  Hz, ArH), 6.79 (2H, d,  $J = 9.1$  Hz, ArH) and 7.07 (2H, d,  $J = 8.6$  Hz, ArH) ppm. <sup>13</sup>C NMR (126 MHz, CDCl<sub>3</sub>)  $\delta$  54.4 (CH<sub>2</sub>CH), 54.5 (CH(OCH<sub>3</sub>)<sub>2</sub>), 55.3 (ArCH<sub>2</sub>), 55.9 (ArOCH<sub>3</sub>), 103.6 (CH(OR)<sub>2</sub>), 114.6 (ArCH), 114.9 (ArCH), 115.4 (ArCH), 128.3 (ArCH), 131.0 (ArCH<sub>2</sub>), 143.5 (ArCN), 151.7 (ArCOCH<sub>3</sub>) and 154.6 (ArCOH) ppm. LC/MS (ES<sup>+</sup>)  $t_r = 1.56$  min (97 %),  $m/z$  317.5 (M<sup>+</sup>); (RP, Isocratic, 90% MeOH). HRMS (ES<sup>+</sup>) calcd. for C<sub>18</sub>H<sub>24</sub>NO<sub>4</sub> (M<sup>+</sup>+H) 318.1700, found 318.1698.

#### **4-(((4-Chlorophenyl)(2,2-dimethoxyethyl)amino)methyl)phenol (9k)**

The crude compound was purified by column chromatography (eluent: from 0% to 30% EtOAc in pet. ether) to give the product as a colorless oil (2.12 g, 66%) which showed: <sup>1</sup>H NMR (500 MHz, CDCl<sub>3</sub>)  $\delta$  3.39 (6H, s, CH<sub>3</sub>), 3.51 (2H, d,  $J = 5.1$  Hz, CH<sub>2</sub>CH), 4.54 (2H, s, ArCH<sub>2</sub>), 4.56 (1H, t,  $J = 5.1$  Hz, CH(OR)<sub>2</sub>), 5.02 (1H, bs, OH), 6.64 (2H, d,  $J = 9.2$  Hz, ArH), 6.76 (2H, d,  $J = 8.6$  Hz, ArH), 7.03 (2H, d,  $J = 8.6$  Hz, ArH) and 7.10 (2H, d,  $J = 9.1$  Hz, ArH) ppm. <sup>13</sup>C NMR (126 MHz, CDCl<sub>3</sub>)  $\delta$  53.8 (CH<sub>2</sub>CH), 54.4 (ArCH<sub>2</sub>), 54.6 (CH<sub>3</sub>), 103.2 (CH(OR)<sub>2</sub>), 113.6 (ArCH), 115.4 (ArCH), 121.4 (ArCCl), 127.8 (ArCH), 128.9 (ArCH), 129.1 (ArCH<sub>2</sub>), 147.2 (ArCN) and 154.5 (ArCOH) ppm. LC/MS (ES<sup>+</sup>)  $t_r = 4.19$  min (74 %),  $m/z$  321.6 (M<sup>+</sup>); (RP, Isocratic, 80% MeOH). HRMS (ES<sup>+</sup>) calcd. for C<sub>17</sub>H<sub>21</sub>ClNO<sub>3</sub> (M<sup>+</sup>+H) 322.1210, found 322.1201; calcd. for C<sub>17</sub>H<sub>20</sub>ClNaO<sub>3</sub> (M<sup>+</sup>+Na) 344.1029, found 344.1043.

#### **N-(3,4-Dimethoxybenzyl)-N-(2,2-dimethoxyethyl)-4-methoxyaniline (9l)**

The crude compound was purified by column chromatography (eluent: from 0% to 40% EtOAc in pet. ether) to give the product as an orange oil (6.58 g, 91%) which showed: <sup>1</sup>H NMR (400 MHz, CDCl<sub>3</sub>)  $\delta$  3.37 (6H, s), 3.45 (2H, t,  $J = 4.7$  Hz), 3.73 (3H, s), 3.81 (3H, s),

3.84 (3H, s), 4.48 (2H, s), 4.56 (1H, bs) and 6.69 – 6.82 (7H, m) ppm. HRMS (ES<sup>+</sup>) calcd. C<sub>20</sub>H<sub>28</sub>NO<sub>5</sub> (M<sup>+</sup>+H) 362.1962, found 362.1976.

#### ***N*-(2,2-Dimethoxyethyl)-4-methoxy-*N*-(3,4,5-trimethoxybenzyl)aniline (9m)**

The crude compound was purified by column chromatography (eluent: from 0% to 50% EtOAc in pet. ether) to give the product as an orange oil (7.71 g, 98%) which showed: <sup>1</sup>H NMR (400 MHz, CDCl<sub>3</sub>) δ 3.37 (6H, s), 3.47 (2H, d, *J* = 5.1 Hz), 3.74 (3H, s), 3.78 (6H, s), 3.81 (3H, s), 4.47 (2H, s), 4.56 (1H, t, *J* = 5.1 Hz), 6.46 (2H, s), 6.72 (2H, d, *J* = 9.2 Hz) and 6.79 (2H, d, *J* = 9.2 Hz) ppm. HRMS (ES<sup>+</sup>) calcd. C<sub>21</sub>H<sub>30</sub>NO<sub>6</sub> (M<sup>+</sup>+H) 392.2068, found 392.2081.

#### **4-Chloro-*N*-(2,2-dimethoxyethyl)-*N*-(2-methoxybenzyl)aniline (9n)**

The crude compound was purified by column chromatography (from 0% to 30% EtOAc in pet. ether) to give the product as a yellow oil (4.84 g, 96%) which showed: <sup>1</sup>H NMR (500 MHz, CDCl<sub>3</sub>) δ 3.40 (6H, s, CH(OCH<sub>3</sub>)<sub>2</sub>), 3.54 (2H, d, *J* = 5.1 Hz, NCH<sub>2</sub>CH), 3.86 (3H, s, ArOCH<sub>3</sub>), 4.59 (2H, s, ArCH<sub>2</sub>N), 4.62 (1H, t, *J* = 5.1 Hz, CH(OCH<sub>3</sub>)<sub>2</sub>), 6.66 (2H, d, *J* = 9.1 Hz, ArCH, aniline), 6.84 (1H, td, *J* = 1.3, 7.2 Hz, ArCH, benzyl), 6.88 (1H, d, *J* = 8.2 Hz, ArCH, benzyl), 6.98 (1H, d, *J* = 7.2 Hz, ArCH, benzyl), 7.10 (2H, d, *J* = 9.1 Hz, ArCH, aniline) and 7.22 (1H, td, *J* = 1.3, 8.2 Hz, ArCH, benzyl) ppm. <sup>13</sup>C NMR (126 MHz, CDCl<sub>3</sub>) δ 50.6 (ArCH<sub>2</sub>), 54.2 (NCH<sub>2</sub>CH), 54.7 (CH(OCH<sub>3</sub>)<sub>2</sub>), 55.1 (ArOCH<sub>3</sub>), 103.1 (CH(OCH<sub>3</sub>)<sub>2</sub>), 110.0 (ArCH, benzyl), 113.7 (2 x ArCH, aniline), 120.3 (ArCH, benzyl), 121.8 (ArC(Cl)), 124.9 (ArCCH<sub>2</sub>), 127.2 (ArCH, benzyl), 127.9 (ArCH, benzyl), 128.9 (2 x ArCH, aniline), 146.7 (ArCN) and 157.1 (ArCO) ppm. HRMS (ES<sup>+</sup>) calc. for C<sub>18</sub>H<sub>23</sub><sup>35</sup>ClNO<sub>3</sub> (M<sup>+</sup>+H) 336.1361, found 336.1355. Calc. for C<sub>18</sub>H<sub>23</sub><sup>37</sup>ClNO<sub>3</sub> (M<sup>+</sup>+H) 338.1331, found 338.1306.

***N*-Benzyl-*N*-(2,2-dimethoxyethyl)-3-methoxyaniline (9o)**

The crude compound was purified by column chromatography (eluent: from 0% to 10% EtOAc in pet. ether) to give a colorless oil (2.21 g, 73%) which showed:  $^1\text{H}$  NMR (500 MHz,  $\text{CDCl}_3$ )  $\delta$  3.40 (6H, s,  $\text{CH}(\text{OCH}_3)_2$ ), 3.55 (2H, d,  $J = 5.1$  Hz,  $\text{CH}_2\text{CH}$ ), 3.74 (3H, s,  $\text{ArOCH}_3$ ), 4.62 (1H, t,  $J = 5.1$  Hz,  $\text{CH}(\text{OR})_2$ ), 4.65 (2H, s,  $\text{ArCH}_2$ ), 6.28 (1H, ddd,  $J = 0.6, 2.5, 8.2$  Hz, ArH), 6.30 (1H, t,  $J = 2.5$  Hz, ArH), 6.36 (1H, ddd,  $J = 0.6, 2.5, 8.2$  Hz, ArH), 7.10 (1H, t,  $J = 8.2$  Hz, ArH), 7.19 - 7.23 (3H, m, ArH) and 7.27 - 7.32 (2H, m, ArH) ppm.  $^{13}\text{C}$  NMR (126 MHz,  $\text{CDCl}_3$ )  $\delta$  53.9 ( $\text{CH}_2\text{CH}$ ), 54.7 ( $\text{CH}(\text{OCH}_3)_2$ ), 55.0 ( $\text{ArCH}_2$ ), 55.2 ( $\text{ArOCH}_3$ ), 99.0 (ArCH), 101.5 (ArCH), 103.5 ( $\text{CH}(\text{OR})_2$ ), 105.5 (ArCH), 126.6 (ArCH), 126.8 (ArCH), 128.7 (ArCH), 130.1 (ArCH), 138.8 ( $\text{ArCCH}_2$ ), 150.2 (ArCN) and 160.9 ( $\text{ArCOCH}_3$ ) ppm. LC/MS ( $\text{ES}^+$ )  $t_r = 2.48$  min (96 %),  $m/z$  301.5 ( $\text{M}^+$ ); (RP, Isocratic, 90% MeOH). HRMS ( $\text{ES}^+$ ) calcd. for  $\text{C}_{18}\text{H}_{24}\text{NO}_3$  ( $\text{M}^+ + \text{H}$ ) 302.1751, found 302.1738.

***N*-Benzyl-*N*-(2,2-dimethoxyethyl)-3,4,5-trimethoxyaniline (9p)**

The crude compound was purified by column chromatography (eluent 0% to 30% EtOAc in pet. ether) to give the product as a colorless oil (3.08 g, 85%) which showed:  $^1\text{H}$  NMR (500 MHz,  $\text{CDCl}_3$ )  $\delta$  3.41 (6H, s,  $\text{CH}(\text{OCH}_3)_2$ ), 3.54 (2H, d,  $J = 5.0$  Hz,  $\text{CH}_2\text{CH}$ ), 3.74 (6H, s,  $\text{ArOCH}_3$ ), 3.76 (3H, s,  $\text{ArOCH}_3$ ), 4.59 (1H, t,  $J = 5.0$  Hz,  $\text{CH}(\text{OR})_2$ ), 4.60 (2H, s,  $\text{ArCH}_2$ ), 5.97 (2H, s, ArH), 7.21 - 7.24 (3H, m, ArH) and 7.28 - 7.33 (2H, m, ArH) ppm.  $^{13}\text{C}$  NMR (126 MHz,  $\text{CDCl}_3$ )  $\delta$  54.66 ( $\text{CH}(\text{OCH}_3)_2$ ), 54.69 ( $\text{CH}_2\text{CH}$ ), 55.73 ( $\text{ArCH}_2$ ), 56.07 ( $\text{ArOCH}_3$ ), 61.21 ( $\text{ArOCH}_3$ ), 91.0 (ArCH), 103.8 ( $\text{CH}(\text{OR})_2$ ), 126.8 (ArCH), 127.0 (ArCH), 128.7 (ArCH), 129.9 ( $\text{ArCOCH}_3$ ), 139.1 ( $\text{ArCCH}_2$ ), 145.8 (ArCN) and 153.8 ( $\text{ArCOCH}_3$ ) ppm. LC/MS ( $\text{ES}^+$ )  $t_r = 1.93$  min (89 %),  $m/z$  361.3 ( $\text{M}^+$ ); (RP, Isocratic, 90% MeOH). HRMS ( $\text{ES}^+$ ) calcd. for  $\text{C}_{20}\text{H}_{28}\text{NO}_5$  ( $\text{M}^+ + \text{H}$ ) 362.1962, found 362.1948.



**General method for the PF cyclization with HClO<sub>4</sub> (method A):** Compound **9a** (3.0 g, 11.1 mmol) was dissolved in 70% HClO<sub>4</sub> (33 mL) and stirred for 1 h at rt. The mixture was then diluted with water (30 mL) and basified by carefully pouring the mixture over Na<sub>2</sub>CO<sub>3</sub>. The aqueous layer was then extracted with EtOAc (3 × 30 mL) and the combined organics were dried with MgSO<sub>4</sub>, filtered and evaporated to give a brown foam (2.97 g).

**General method for the PF cyclization with HCl (method B):** Compound **9f** (500 mg, 1.66 mmol) was dissolved in 6 M HCl (2 mL) and stirred at rt for 1 h during which time the mixture turned red. The reaction mixture was cooled to 0 °C and then quenched by the slow addition of aq 3 M NaOH (10 mL) (a white suspension with a yellow precipitate formed). The mixture was then extracted with EtOAc (3 × 20 mL). The organic layer was dried with MgSO<sub>4</sub>, filtered and evaporated to give a yellow-brown oil (445 mg).

### **2-Phenyl-1,2,3,4-tetrahydroisoquinolin-4-ol (10a)**

The compound was synthesized according to method A. A sample of crude compound was purified by column chromatography (eluent: from 0% to 10% EtOAc in pet. ether) to give a yellow oil which showed: <sup>1</sup>H NMR (500 MHz, CDCl<sub>3</sub>) δ 2.65 (1H, bs, OH), 3.39 (1H, dd, *J* = 2.6, 12.6 Hz, H<sub>3</sub>-THIQ), 3.86 (1H, ddd, *J* = 1.1, 3.8, 12.6 Hz, H<sub>3</sub>-THIQ), 4.20 (1H, d, *J* = 15.4 Hz, H<sub>1</sub>-THIQ), 4.49 (1H, d, *J* = 15.4 Hz, H<sub>1</sub>-THIQ), 4.79 (1H, bs, H<sub>4</sub>-THIQ), 6.94 (1H, tt, *J* = 1.1, 7.4 Hz, ArH, phenyl), 7.09 (2H, dd, *J* = 1.0, 8.8 Hz, ArH, phenyl), 7.17 – 7.23 (1H, m), 7.29 – 7.32 (2H, m, H<sub>6</sub>,H<sub>7</sub>-THIQ), 7.34 (2H, dd, *J* = 7.3, 8.8 Hz, ArH, phenyl) and 7.47 – 7.51 (1H, m) ppm. <sup>13</sup>C NMR (126 MHz, CDCl<sub>3</sub>) δ 51.4 (C<sub>1</sub>-THIQ), 55.6 (C<sub>3</sub>-THIQ), 67.3 (C<sub>4</sub>-THIQ), 116.6 (ArCH, phenyl), 120.2 (ArCH, phenyl), 126.5, 127.2, 128.2, 129.3, 129.4 (ArCH, phenyl), 136.7, 134.3 and 151.1 (ArCN) ppm. LC/MS (ES<sup>+</sup>) *t<sub>r</sub>* = 1.75 min (66 %), *m/z* 226.0 (M<sup>+</sup>+H); (RP, Isocratic, 90% MeOH). HRMS (ES<sup>+</sup>) calcd. for C<sub>15</sub>H<sub>16</sub>NO (M<sup>+</sup>+H) 226.1226, found 226.1234.

### 6-Methoxy-2-phenyl-1,2,3,4-tetrahydroisoquinolin-4-ol (10b)

The compound was synthesized according to method A. A sample of crude compound was purified by column chromatography (eluent: from 0% to 30% EtOAc in pet. ether) to give a yellow oil which showed:  $^1\text{H}$  NMR (500 MHz,  $\text{CDCl}_3$ )  $\delta$  2.54 (1H, bs, OH), 3.37 (1H, dd,  $J$  = 2.6, 12.6 Hz,  $\text{H}_3$ -THIQ), 3.83 (3H, s,  $\text{ArOCH}_3$ ), 3.84 (4H, ddd,  $J$  = 1.1, 3.8, 12.6 Hz,  $\text{H}_3$ -THIQ), 4.14 (1H, d,  $J$  = 14.9 Hz,  $\text{H}_1$ -THIQ), 4.43 (1H, d,  $J$  = 14.9 Hz,  $\text{H}_1$ -THIQ), 4.74 (1H, bs,  $\text{H}_4$ -THIQ), 6.88 (1H, dd,  $J$  = 2.7, 8.4 Hz,  $\text{H}_7$ -THIQ), 6.91 (1H, tt,  $J$  = 0.8, 7.4 Hz, ArH, phenyl), 7.01 (1H, d,  $J$  = 2.7 Hz,  $\text{H}_5$ -THIQ), 7.07 (2H, dd,  $J$  = 0.8, 8.7 Hz, ArH, phenyl), 7.10 (1H, d,  $J$  = 8.4 Hz,  $\text{H}_8$ -THIQ) and 7.32 (2H, dd,  $J$  = 7.3, 8.7 Hz, ArH, phenyl) ppm.  $^{13}\text{C}$  NMR (126 MHz,  $\text{CDCl}_3$ )  $\delta$  50.9 ( $\text{C}_1$ -THIQ), 55.5 ( $\text{ArOCH}_3$ ), 55.5 ( $\text{C}_3$ -THIQ), 67.6 ( $\text{C}_4$ -THIQ), 113.1 ( $\text{C}_5$ -THIQ), 115.3 ( $\text{C}_7$ -THIQ), 116.6 (ArCH, phenyl), 120.2 (ArCH, phenyl), 126.4 ( $\text{C}_1\text{--C}_8$ -THIQ), 127.6 ( $\text{C}_8$ -THIQ), 129.4 (ArCH, phenyl), 137.8 ( $\text{C}_4\text{--C}_5$ -THIQ), 151.2 (ArCN) and 158.7 ( $\text{C}_6$ -THIQ) ppm. LC/MS (ES+)  $t_r$  = 1.77 min (56%),  $m/z$  255.9 ( $\text{M}^+\text{+H}$ ). HRMS (ES+) calcd. for  $\text{C}_{16}\text{H}_{18}\text{NO}_2$  ( $\text{M}^+\text{+H}$ ) 256.1332, found 256.1326.

### 2-Phenyl-1,2,3,4-tetrahydroisoquinoline-4,6-diol (10d)

The compound was synthesized according to method A. The crude compound was obtained as a brown-yellow solid (2.15 g) which showed:  $^1\text{H}$  NMR (400 MHz,  $\text{CDCl}_3$ )  $\delta$  3.42 (1H, ddd,  $J$  = 0.6, 2.9, 12.7 Hz), 3.85 (1H, ddd,  $J$  = 1.0, 4.0, 12.7 Hz), 4.17 (1H, d,  $J$  = 14.3 Hz), 4.46 (1H, d,  $J$  = 14.2 Hz), 4.76 (1H, s), 6.84 (1H, dd,  $J$  = 2.7, 8.4 Hz), 6.92 - 7.05 (2H, m), 7.08 - 7.13 (3H, m) and 7.31 - 7.39 (3H, m) ppm. LC/MS (ES+)  $t_r$  = 1.22 min (81 %),  $m/z$  242.1 ( $\text{M}^+\text{+H}$ ); (RP, Isocratic, 90% MeOH).

### 7-Bromo-2-phenyl-1,2,3,4-tetrahydroisoquinolin-4-ol (10e)

The compound was synthesized according to method A. The crude compound was obtained as a pale yellow oil (250 mg, 48%) which showed:  $^1\text{H}$  NMR (500 MHz,  $\text{CDCl}_3$ )  $\delta$

3.19 (1H, dd,  $J = 2.1, 12.9$  Hz,  $\text{CH}_2\text{CH}$ ), 4.07 (1H, ddd,  $J = 1.6, 2.4, 12.9$  Hz,  $\text{CH}_2\text{CH}$ ), 4.11 (1H, d,  $J = 15.2$  Hz,  $\text{ArCH}_2$ ), 4.54 (1H, d,  $J = 15.5$  Hz,  $\text{ArCH}_2$ ), 5.03 (1H, t,  $J = 2.3$  Hz,  $\text{CHOH}$ ), 6.95 (1H, tt,  $J = 0.9, 7.4$  Hz,  $\text{ArH}$ ), 7.10 (2H, dd,  $J = 0.9, 8.7$  Hz,  $\text{ArH}$ ), 7.16 (1H, d,  $J = 2.0$  Hz,  $\text{ArH}$ ), 7.17 (1H, d,  $J = 7.2$  Hz,  $\text{ArH}$ ), 7.34 (2H, dd,  $J = 7.4, 8.7$  Hz,  $\text{ArH}$ ) and 7.52 (1H, dd,  $J = 2.0, 7.2$  Hz,  $\text{ArH}$ ) ppm.  $^{13}\text{C}$  NMR (126 MHz,  $\text{CDCl}_3$ )  $\delta$  51.5 ( $\text{ArCH}_2$ ), 55.7 ( $\text{CH}_2\text{CH}$ ), 66.7 ( $\text{CHOH}$ ), 116.8 ( $\text{ArCH}$ ), 117.0 ( $\text{ArCH}$ ), 120.8 ( $\text{ArCH}$ ), 125.8 ( $\text{ArCBr}$ ), 126.0 ( $\text{ArCH}$ ), 129.4 ( $\text{ArCH}$ ), 131.4 ( $\text{ArCH}$ ), 135.6 ( $\text{ArCCH}$ ), 137.1 ( $\text{ArCCH}_2$ ) and 150.9 ( $\text{ArCN}$ ) ppm. LC/MS ( $\text{ES}^+$ )  $t_r = 1.97$  min (61 %),  $m/z$  303.4 ( $\text{M}^+ + \text{H}$ ) ( $^{79}\text{Br}$ ), 305.4 ( $\text{M}^+ + \text{H}$ ) ( $^{81}\text{Br}$ ); (RP, Isocratic, 90% MeOH). HRMS ( $\text{ES}^+$ ) calcd. for  $\text{C}_{15}\text{H}_{15}\text{BrNO}$  ( $\text{M}^+ + \text{H}$ ) ( $^{79}\text{Br}$ ) 304.0332, found 304.0335; calcd. for  $\text{C}_{15}\text{H}_{15}\text{BrNO}$  ( $\text{M}^+ + \text{H}$ ) ( $^{81}\text{Br}$ ) 306.0311, found 306.0323.

#### **7-Methoxy-2-phenyl-1,2,3,4-tetrahydroisoquinolin-4-ol (10f)**

The compound was synthesized according to method A. The crude compound was purified with chromatography (eluent: from 0% to 25% EtOAc in pet. ether) to give the product as a yellow oil (302 mg, 71%) which showed:  $^1\text{H}$  NMR (400 MHz,  $\text{CDCl}_3$ )  $\delta$  2.54 (1H, bs), 3.33 (2H, dd,  $J = 2.3, 12.6$  Hz), 3.81 (4H, s), 3.87 (2H, dd,  $J = 3.0, 12.6$  Hz), 4.14 (2H, d,  $J = 15.4$  Hz), 4.45 (2H, d,  $J = 15.4$  Hz), 4.73 (1H, s), 6.69 (1H, d,  $J = 2.3$  Hz), 6.84 (1H, dd,  $J = 2.3, 8.4$  Hz), 6.92 (1H, t,  $J = 7.3$  Hz), 7.07 (2H, d,  $J = 8.1$  Hz), 7.32 (2H, t,  $J = 7.8$  Hz) and 7.39 (2H, d,  $J = 8.4$  Hz) ppm. LC/MS ( $\text{ES}^+$ )  $t_r = 1.71$  min (75 %),  $m/z$  255.9 ( $\text{M}^+ + \text{H}$ ); (RP, Isocratic, 90% MeOH). HRMS ( $\text{ES}^+$ ) calcd.  $\text{C}_{16}\text{H}_{17}\text{NNaO}_2$  ( $\text{M}^+ + \text{Na}$ ) 278.1151, found 278.1153.

#### **2-(4-Clorophenyl)-7-methoxy-1,2,3,4-tetrahydroisoquinolin-4-ol (10g)**

The compound was synthesized according to method A. The crude compound was purified by column chromatography (eluent: from 0% to 40% EtOAc in pet. ether) to give a dark yellow wax (2.39 g, 31%) which showed:  $^1\text{H}$  NMR (500 MHz,  $\text{CDCl}_3$ )  $\delta$  2.36 (1H, d,  $J$

= 8.6 Hz, OH), 3.32 (2H, dd,  $J = 2.5, 12.6$  Hz, H<sub>3</sub>-THIQ), 3.82 (3H, s, OCH<sub>3</sub>), 3.82 (5H, ddd,  $J = 1.3, 3.5, 12.8$  Hz, H<sub>3</sub>-THIQ), 4.13 (2H, d,  $J = 15.3$  Hz, H<sub>1</sub>-THIQ), 4.42 (2H, d,  $J = 15.3$  Hz, H<sub>1</sub>-THIQ), 4.74 (1H, bs, H<sub>4</sub>-THIQ), 6.69 (1H, d,  $J = 2.6$  Hz, H<sub>8</sub>-THIQ), 6.85 (1H, dd,  $J = 2.6, 8.5$  Hz, H<sub>6</sub>-THIQ), 6.98 (3H, d,  $J = 9.0$  Hz, ArH, phenyl), 7.25 (4H, d,  $J = 9.0$  Hz, ArH, phenyl) and 7.39 (1H, d,  $J = 8.5$  Hz, H<sub>5</sub>-THIQ) ppm. <sup>13</sup>C NMR (126 MHz, CDCl<sub>3</sub>)  $\delta$  51.3 (C<sub>1</sub>-THIQ), 55.3 (OCH<sub>3</sub>), 55.7 (C<sub>3</sub>-THIQ), 66.7 (C<sub>4</sub>-THIQ), 110.9 (C<sub>8</sub>-THIQ), 113.4 (C<sub>6</sub>-THIQ), 117.6 (ArCH, phenyl), 124.9 (ArCCI), 129.0 (C<sub>5</sub>CC<sub>6</sub>-THIQ), 129.1 (ArCH, phenyl), 130.5 (C<sub>5</sub>-THIQ), 135.3 (C<sub>1</sub>CC<sub>8</sub>-THIQ), 149.6 (ArCN) and 159.4 (C<sub>7</sub>-THIQ) ppm. LC/MS (ES<sup>+</sup>)  $t_r = 1.95$  min (92 %),  $m/z$  290.0 (M<sup>+</sup>+H); (RP, Isocratic, 90% MeOH). HRMS (ES<sup>+</sup>) calcd. for C<sub>16</sub>H<sub>17</sub><sup>35</sup>ClNO<sub>2</sub> (M<sup>+</sup>+H) 290.0942, found 290.0935; calcd. C<sub>16</sub>H<sub>17</sub><sup>37</sup>ClNO<sub>2</sub> (M<sup>+</sup>+H) 292.0913, found 292.0935.

### **2-*p*-Tolyl-1,2,3,4-tetrahydroisoquinoline-4,6-diol (10i)**

The compound was synthesized according to method A. The crude compound was obtained as a brown-yellow solid (2.05 g) which showed: <sup>1</sup>H NMR (400 MHz, CDCl<sub>3</sub>)  $\delta$  3.31 (1H, dd,  $J = 2.5, 12.2$  Hz), 3.76 (1H, dd,  $J = 3.5, 12.2$  Hz), 4.07 (1H, d,  $J = 14.9$  Hz), 4.36 (1H, d,  $J = 14.9$  Hz), 4.69 (1H, s), 6.64 (1H, d,  $J = 8.7$  Hz), 6.71 - 6.83 (2H, m) and 6.89 - 7.17 (4H, m) ppm. LC/MS (ES<sup>+</sup>)  $t_r = 1.52$  min (70 %),  $m/z$  256.1 (M<sup>+</sup>+H); (RP, Isocratic, 90% MeOH).

### **2-(4-methoxyphenyl)-1,2,3,4-tetrahydroisoquinoline-4,6-diol (10j)**

The compound was synthesized according to method A. The crude compound was obtained as a brown-yellow solid (2.17 g) which showed: <sup>1</sup>H NMR (400 MHz, CDCl<sub>3</sub>)  $\delta$  3.26 (1H, dd,  $J = 2.5, 12.4$  Hz), 3.62 (1H, ddd,  $J = 1.1, 3.7, 12.2$  Hz), 3.78 (3H, s), 4.00 (1H, d,  $J = 14.6$  Hz), 4.25 (1H, d,  $J = 14.6$  Hz), 4.66 (1H, t,  $J = 3.0$  Hz), 6.77 (1H, dd,  $J = 2.7, 8.3$  Hz), 6.87 (2H, d,  $J = 9.0$  Hz), 6.90 (1H, d,  $J = 2.7$  Hz), 6.99 (1H, d,  $J = 8.3$  Hz) and

7.02 (2H, d,  $J = 9.0$  Hz) ppm. LC/MS ( $ES^+$ )  $t_r = 1.35$  min (98 %),  $m/z$  271.8 ( $M^+ + H$ ); (RP, Isocratic, 90% MeOH).

### **2-(4-Chlorophenyl)-1,2,3,4-tetrahydroisoquinoline-4,6-diol (10k)**

The compound was synthesized according to method A. The crude compound was purified by column chromatography (eluent: 10% MeOH in DCM) to give a yellow-brown solid (1.88g, 95%) which showed:  $^1H$  NMR (500 MHz,  $CDCl_3$ )  $\delta$  2.63 (1H, bs,  $C_4OH$ ), 3.37 (1H, dd,  $J = 2.2, 12.6$  Hz,  $H_3-THIQ$ ), 3.76 (1H, dd,  $J = 3.6, 12.6$  Hz,  $H_3-THIQ$ ), 4.11 (1H, d,  $J = 14.8$  Hz,  $H_1-THIQ$ ), 4.38 (1H, d,  $J = 14.8$  Hz,  $H_1-THIQ$ ), 4.72 (1H, s,  $H_4-THIQ$ ), 5.30 (1H, bs,  $C_6OH$ ), 6.81 (1H, dd,  $J = 2.3, 8.3$  Hz,  $H_7-THIQ$ ), 6.96 (1H, d,  $J = 2.2$  Hz,  $H_5-THIQ$ ), 6.99 (2H, d,  $J = 8.7$  Hz, 2 x ArCH, phenyl), 7.05 (1H, d,  $J = 8.3$  Hz,  $H_7-THIQ$ ) and 7.27 (2H, d,  $J = 8.7$  Hz, 2 x ArCH, phenyl) ppm.  $^{13}C$  NMR (126 MHz,  $CDCl_3$ )  $\delta$  50.8 ( $C_1-THIQ$ ), 55.3 ( $C_3-THIQ$ ), 67.1 ( $C_4-THIQ$ ), 115.1 ( $C_5-THIQ$ ), 115.9 ( $C_7-THIQ$ ), 117.6 (2 x ArCH, phenyl), 125.0 (ArCCl), 125.9 ( $C_1CC_8-THIQ$ ), 127.7 ( $C_8-THIQ$ ), 129.1 (2 x ArCH, phenyl), 137.6 ( $C_4CC_5-THIQ$ ), 149.6 (ArCN) and 154.6 ( $C_6-THIQ$ ) ppm. LC/MS ( $ES^+$ )  $t_r = 1.65$  min (72 %),  $m/z$  276.1 ( $M^+ + H$ ); (RP, Isocratic, 90% MeOH). HRMS ( $ES^-$ ) calcd. for  $C_{15}H_{13}ClNO_2$  ( $M^- - H$ ) 274.0640, found 274.0629. Mp 168-171 °C

### **6,7-Dimethoxy-2-(4-methoxyphenyl)-1,2,3,4-tetrahydroisoquinolin-4-ol (10l)**

The compound was synthesized according to method A. The crude compound was purified by column chromatography (eluent: from 0% to 50% EtOAc in pet. ether) to give the product as a white solid (3.54 g, 62%) which showed:  $^1H$  NMR (500 MHz,  $CDCl_3$ )  $\delta$  2.67 (1H, bs, OH), 3.23 (1H, dd,  $J = 2.3, 12.3$  Hz,  $H_3-THIQ$ ), 3.71 (1H, dd,  $J = 3.1, 12.3$  Hz,  $H_3-THIQ$ ), 3.79 (3H, s,  $OCH_3$ , phenyl), 3.88 (3H, s,  $C_6OCH_3-THIQ$ ), 3.90 (3H, s,  $C_7OCH_3-THIQ$ ), 4.01 (1H, d,  $J = 14.8$  Hz,  $H_1-THIQ$ ), 4.27 (1H, d,  $J = 14.8$  Hz,  $H_1-THIQ$ ), 4.67 (1H, bs,  $H_4-THIQ$ ), 6.62 (1H, s,  $H_8-THIQ$ ), 6.89 (2H, d,  $J = 9.0$  Hz, 2 x ArCH, phenyl), 6.96 (1H,

s, H<sub>5</sub>-THIQ) and 7.03 (2H, d,  $J$  = 8.9 Hz, 2 x ArCH, phenyl) ppm. <sup>13</sup>C NMR (126 MHz, CDCl<sub>3</sub>)  $\delta$  52.7 (C<sub>1</sub>-THIQ), 55.6 (OCH<sub>3</sub>, phenyl), 55.9 (2 x OCH<sub>3</sub>, THIQ), 57.2 (C<sub>3</sub>-THIQ), 67.2 (C<sub>4</sub>-THIQ), 108.6 (C<sub>8</sub>-THIQ), 111.6 (C<sub>5</sub>-THIQ), 114.5 (2 x ArCH, phenyl), 118.9 (2 x ArCH, phenyl), 126.8 (C<sub>1</sub>CC<sub>8</sub>-THIQ), 128.6 (C<sub>4</sub>CC<sub>5</sub>-THIQ), 145.3 (ArCN), 148.1 (C<sub>7</sub>-THIQ), 148.9 (C<sub>6</sub>-THIQ) and 154.2 (ArCO, phenyl) ppm. HRMS (ES<sup>+</sup>) calcd. C<sub>18</sub>H<sub>22</sub>NO<sub>4</sub> (M<sup>+</sup>+H) 316.1543, found 316.1543. Mp 136-137 °C (DCM/Et<sub>2</sub>O).

#### **5,6,7-Trimethoxy-2-(4-methoxyphenyl)-1,2,3,4-tetrahydroisoquinolin-4-ol (10m)**

The compound was synthesized according to method A. The crude compound was purified by column chromatography (eluent: from 0% to 100% EtOAc in pet. ether) to give the product as a dark brown solid (5.49 g, 82%) which showed: <sup>1</sup>H NMR (500 MHz, CDCl<sub>3</sub>)  $\delta$  2.90 (1H, bs, OH), 3.18 (1H, dd,  $J$  = 2.7, 12.4 Hz, H<sub>3</sub>-THIQ), 3.70 (1H, dd,  $J$  = 3.5, 12.6 Hz, H<sub>3</sub>-THIQ), 3.79 (3H, s, OCH<sub>3</sub>, phenyl), 3.86 (3H, s, C<sub>6</sub>OCH<sub>3</sub>-THIQ), 3.87 (3H, s, C<sub>7</sub>OCH<sub>3</sub>-THIQ), 3.98 (1H, d,  $J$  = 15.1 Hz, H<sub>1</sub>-THIQ), 4.02 (3H, s, C<sub>5</sub>OCH<sub>3</sub>-THIQ), 4.29 (1H, d,  $J$  = 15.0 Hz, H<sub>1</sub>-THIQ), 4.98 (1H, bs, H<sub>4</sub>-THIQ), 6.45 (1H, s, H<sub>8</sub>-THIQ), 6.88 (2H, d,  $J$  = 9.0 Hz, 2 x ArCH, phenyl) and 7.04 (2H, d,  $J$  = 9.0 Hz, 2 x ArCH, phenyl) ppm. <sup>13</sup>C NMR (126 MHz, CDCl<sub>3</sub>)  $\delta$  53.2 (C<sub>1</sub>-THIQ), 55.6 (OCH<sub>3</sub>, phenyl), 56.0 (C<sub>6</sub>OCH<sub>3</sub>-THIQ), 56.9 (C<sub>3</sub>-THIQ), 60.9 (C<sub>7</sub>OCH<sub>3</sub>-THIQ), 61.5 (C<sub>5</sub>OCH<sub>3</sub>-THIQ), 62.7 (C<sub>4</sub>-THIQ), 104.6 (C<sub>8</sub>-THIQ), 114.5 (2 x ArCH, phenyl), 119.1 (2 x ArCH, phenyl), 123.0 (C<sub>1</sub>CC<sub>8</sub>-THIQ), 130.5 (C<sub>4</sub>CC<sub>5</sub>-THIQ), 140.6 (C<sub>7</sub>-THIQ), 145.3 (ArCN), 152.2 (C<sub>5</sub>-THIQ), 153.5 (C<sub>6</sub>-THIQ) and 154.3 (ArCO, phenyl) ppm. HRMS (ES<sup>+</sup>) calcd. C<sub>19</sub>H<sub>24</sub>NO<sub>5</sub> (M<sup>+</sup>+H) 346.1649, found 346.1638.

#### **2-(3-Methoxyphenyl)-1,2,3,4-tetrahydroisoquinolin-4-ol (10o)**

The compound was synthesized according to method A. The crude compound was obtained as a yellow oil (1.73 g) which showed: <sup>1</sup>H NMR (400 MHz, CDCl<sub>3</sub>)  $\delta$  2.46 (1H, bs), 3.40 (1H, dd,  $J$  = 2.7, 12.6 Hz), 3.83 (3H, s), 3.85 (1H, ddd,  $J$  = 0.7, 3.9, 12.6 Hz), 4.21

(1H, d,  $J$  = 15.5 Hz), 4.50 (1H, d,  $J$  = 15.5 Hz), 4.79 (1H, s), 6.47 (1H, dd,  $J$  = 2.3, 8.2 Hz), 6.61 (1H, t,  $J$  = 2.3 Hz), 6.69 (1H, dd,  $J$  = 2.3, 8.2 Hz), 7.17 - 7.20 (1H, m), 7.23 (1H, t,  $J$  = 8.2 Hz), 7.28 - 7.32 (2H, m) and 7.45 - 7.53 (1H, m) ppm. LC/MS (ES<sup>+</sup>)  $t_r$  = 1.78 min (87 %),  $m/z$  256.1 (M<sup>+</sup>+H); (RP, Isocratic, 90% MeOH).

### **1-(2-(Benzylamino)-4,6-dimethoxyphenyl)-2,2-dimethoxyethan-1-ol (11)**

The crude compound was purified by chromatography (eluent 0% to 40% EtOAc in pet. ether) to give the product as a pale yellow oil (1.94 g, 56%). <sup>1</sup>H NMR (400 MHz, CDCl<sub>3</sub>)  $\delta$  3.28 (3H, s, CHOCH<sub>3</sub>), 3.47 (3H, s, CHOCH<sub>3</sub>), 3.70 (3H, s, ArOCH<sub>3</sub>), 3.78 (3H, s, ArOCH<sub>3</sub>), 4.32 (2H, d,  $J$  = 2.8 Hz, ArCH<sub>2</sub>), 4.75 (1H, d,  $J$  = 6.9 Hz, CH(OR)<sub>2</sub>), 5.24 (1H, d,  $J$  = 6.9 Hz, ArCH), 5.88 (1H, d,  $J$  = 2.2 Hz, ArH), 5.94 (1H, d,  $J$  = 2.2 Hz, ArH), 7.23 - 7.26 (1H, m, ArH) and 7.31 - 7.37 (4H, m, ArH) ppm. <sup>13</sup>C NMR (101 MHz, CDCl<sub>3</sub>)  $\delta$  48.0 (ArCH<sub>2</sub>), 54.9 (ArOCH<sub>3</sub>), 55.0 (CHOCH<sub>3</sub>), 55.7 (ArOCH<sub>3</sub>), 55.9 (CHOCH<sub>3</sub>), 68.2 (ArCHOH), 88.2 (ArCH), 91.3 (ArCH), 103.7 (ArCCH), 105.2 (CH(OR)<sub>2</sub>), 127.0 (ArCH), 127.3 (ArCH), 128.6 (ArCH), 139.7 (ArCCH<sub>2</sub>), 149.4 (ArCN), 159.3 (ArCOCH<sub>3</sub>) and 161.1 (ArCOCH<sub>3</sub>) ppm. LC/MS (ES<sup>+</sup>)  $t_r$  = 1.27 min (95%),  $m/z$  348.0 (M<sup>+</sup>+H); HRMS (ES<sup>+</sup>) calcd. for C<sub>19</sub>H<sub>26</sub>NO<sub>5</sub> (M<sup>+</sup>+H) 348.1805, found 348.1793.

### **5-Bromo-2-phenyl-1,2,3,4-tetrahydroisoquinolin-4-ol (14e)**

The compound was synthesized according to method A. The crude compound was obtained as a pale yellow oil (50 mg, 10%) which showed: <sup>1</sup>H NMR (500 MHz, CDCl<sub>3</sub>)  $\delta$  3.35 (1H, dd,  $J$  = 2.7, 12.7 Hz, CH<sub>2</sub>CH), 3.77 (1H, ddd,  $J$  = 1.0, 3.9, 12.7 Hz, CH<sub>2</sub>CH), 3.89 (1H, bs, OH), 4.13 (1H, d,  $J$  = 15.6 Hz, ArCH<sub>2</sub>), 4.37 (1H, d,  $J$  = 15.6 Hz, ArCH<sub>2</sub>), 4.72 (1H, t,  $J$  = 3.3 Hz, CHOH), 6.93 (1H, tt,  $J$  = 0.9, 7.2 Hz, ArH), 7.03 (2H, dd,  $J$  = 0.9, 8.7 Hz, ArH), 7.29 - 7.35 (4H, m, ArH) and 7.39 (1H, dd,  $J$  = 2.0, 8.2 Hz, ArH) ppm. <sup>13</sup>C NMR (126 MHz, CDCl<sub>3</sub>)  $\delta$  51.0 (ArCH<sub>2</sub>), 55.5 (CH<sub>2</sub>CH), 66.6 (CHOH), 116.7 (ArCH), 120.6 (ArCH),

121.9 (ArCBr), 129.3 (ArCH), 129.4 (ArCH), 130.3 (ArCH), 131.0 (ArCH), 135.7 (ArCCH), 136.5 (ArCCH<sub>2</sub>) and 150.7 (ArCN) ppm. LC/MS (ES<sup>+</sup>) t<sub>r</sub> = 2.20 min (86 %), m/z 303.4 (M<sup>+</sup>+H) (<sup>79</sup>Br), 305.4 (M<sup>+</sup>+H) (<sup>81</sup>Br); (RP, Isocratic, 90% MeOH). HRMS (ES+) calcd. for C<sub>15</sub>H<sub>15</sub><sup>79</sup>BrNO (M<sup>+</sup>+H) 304.0332, found 304.0321; calcd. for C<sub>15</sub>H<sub>15</sub><sup>81</sup>BrNO (M<sup>+</sup>+H) 306.0311, found 306.0320.

### **1-Benzyl-4,5,6-trimethoxy-1*H*-indole (16p)**

The compound was synthesized according to method A. The crude compound was purified by chromatography (eluent from 0% to 30% EtOAc in pet. ether) to yield the product as a pale yellow oil (71 mg, 22%) which showed: <sup>1</sup>H NMR (500 MHz, CDCl<sub>3</sub>) δ 3.82 (3H, s, CH<sub>3</sub>), 3.87 (3H, s, CH<sub>3</sub>), 4.13 (3H, s, CH<sub>3</sub>), 5.23 (2H, s, ArCH<sub>2</sub>), 6.47 (1H, s, ArH), 6.59 (1H, dd, *J* = 0.8, 3.2 Hz, ArH), 6.94 - 6.97 (1H, m, ArH), 7.11 - 7.15 (2H, m, ArH) and 7.25 - 7.34 (3H, m, ArH) ppm. <sup>13</sup>C NMR (126 MHz, CDCl<sub>3</sub>) δ 50.2 (ArCH<sub>2</sub>), 56.3 (CH<sub>3</sub>), 60.7 (CH<sub>3</sub>), 61.4 (CH<sub>3</sub>), 88.2 (ArCH), 99.2 (ArCH), 115.6 (ArCCH), 126.2 (ArCH), 126.8 (ArCH), 127.6 (ArCH), 128.7 (ArCH), 133.4 (ArCN), 135.5 (ArCOCH<sub>3</sub>), 137.3 (ArCCH<sub>2</sub>), 145.9 (ArCOCH<sub>3</sub>) and 151.0 (ArCOCH<sub>3</sub>) ppm. LC/MS (ES<sup>+</sup>) t<sub>r</sub> = 1.02 min (76 %), m/z 298.1 (M<sup>+</sup>+H); (RP, Isocratic, 90% MeOH); HRMS (ES+) calcd. for C<sub>18</sub>H<sub>20</sub>NO<sub>3</sub> (M<sup>+</sup>+H) 298.1438, found 298.1448.

### ***N*-Benzyl-2,2-dimethoxy-*N*-phenethylethanamine (18)**

2-Phenylethylamine (1.3 mL, 10.0 mmol) and benzaldehyde (1.0 mL, 10.0 mmol) were dissolved in CHCl<sub>3</sub> (50 mL) and treated with NaBH(OAc)<sub>3</sub> (3.3 g, 15.0 mmol). After stirring for 2 h at rt, 2,2-dimethoxyacetaldehyde (1.5 mL, 10.0 mmol) was introduced followed by NaBH(OAc)<sub>3</sub> (3.30 g, 15.0 mmol). After stirring for 6 h, the mixture was quenched with a saturated aqueous solution of NaHCO<sub>3</sub> and the aqueous layer was extracted with EtOAc (2 × 50 mL). The combined organics were dried with MgSO<sub>4</sub>, filtered and evaporated to



give a pale green oil (2.52 g) which showed:  $^1\text{H}$  NMR (500 MHz,  $\text{CDCl}_3$ )  $\delta$  2.74 (2H, d,  $J = 5.2$  Hz,  $\text{CHCH}_2$ ), 2.83 (4H, s,  $\text{CH}_2\text{CH}_2$ ), 3.34 (6H, s,  $\text{CH}_3$ ), 3.77 (2H, s,  $\text{ArCH}_2\text{N}$ ), 4.43 (1H, t,  $J = 5.2$  Hz,  $\text{ArH}$ ), 7.15 - 7.23 (3H, m,  $\text{ArH}$ ) and 7.24 - 7.37 (7H, m,  $\text{ArH}$ ) ppm.  $^{13}\text{C}$  NMR (126 MHz,  $\text{CDCl}_3$ )  $\delta$  33.6 ( $\text{ArCH}_2\text{CH}_2$ ), 53.9 ( $\text{CH}_3$ ), 55.9 ( $\text{CHCH}_2\text{N}$ ), 56.7 ( $\text{CH}_2\text{CH}_2\text{N}$ ), 59.4 ( $\text{ArCH}_2\text{N}$ ), 104.2 ( $\text{CH}(\text{OR})_2$ ), 126.0 ( $\text{ArCH}$ ), 127.0 ( $\text{ArCH}$ ), 128.3 ( $\text{ArCH}$ ), 128.4 ( $\text{ArCH}$ ), 129.0 ( $\text{ArCH}$ ), 129.0 ( $\text{ArCH}$ ), 139.7 ( $\text{ArCCH}_2\text{N}$ ) and 140.7 ( $\text{ArCCH}_2\text{CH}_2$ ) ppm. LC/MS ( $\text{ES}^+$ )  $t_r = 1.08$  min (98 %),  $m/z$  300.2 ( $\text{M}^+ + \text{H}$ ); (RP, Isocratic, 90% MeOH). HRMS ( $\text{ES}^+$ ) calcd. for  $\text{C}_{19}\text{H}_{26}\text{NO}_2$  ( $\text{M}^+ + \text{H}$ ) 300.1958, found 300.1967.

### 5,7,8,13-Tetrahydro-6,13-methanodibenzo[*c,f*]azonine (21)

The compound was synthesized according to method A. The crude compound was obtained as a yellow oil (856 mg, 83%) which showed:  $^1\text{H}$  NMR (500 MHz,  $\text{CDCl}_3$ )  $\delta$  2.35 (1H, ddd,  $J = 1.3, 4.4, 15.7$  Hz,  $\text{ArCH}_2\text{CH}_2\text{N}$ ), 3.10 (1H, ddd,  $J = 2.2, 12.9, 15.7$  Hz,  $\text{ArCH}_2\text{CH}_2\text{N}$ ), 3.31 (1H, ddd,  $J = 2.2, 12.9, 15.0$  Hz,  $\text{ArCH}_2\text{CH}_2\text{N}$ ), 3.46 (1H, ddd,  $J = 1.3, 4.4, 15.0$  Hz,  $\text{ArCH}_2\text{CH}_2\text{N}$ ), 3.56 (1H, dd,  $J = 0.8, 13.9$  Hz,  $\text{NCH}_2\text{CH}$ ), 3.67 (1H, ddd,  $J = 1.0, 5.2, 13.9$  Hz,  $\text{NCH}_2\text{CH}$ ), 3.88 (1H, d,  $J = 5.2$  Hz,  $\text{CH}_2\text{CH}$ ), 4.09 (1H, dd,  $J = 1.5, 17.1$  Hz,  $\text{ArCH}_2\text{N}$ ), 4.61 (1H, d,  $J = 17.3$  Hz,  $\text{ArCH}_2\text{N}$ ), 6.96 (1H, d,  $J = 7.4$  Hz,  $\text{ArH}$ ), 7.03 (1H, d,  $J = 8.6$  Hz,  $\text{ArH}$ ), 7.06 - 7.13 (3H, m,  $\text{ArH}$ ), 7.13 - 7.22 (2H, m,  $\text{ArH}$ ) and 7.32 (1H, dd,  $J = 1.2, 7.4$  Hz,  $\text{ArH}$ ) ppm.  $^{13}\text{C}$  NMR (126 MHz,  $\text{CDCl}_3$ )  $\delta$  34.7 ( $\text{ArCH}_2\text{CH}_2\text{N}$ ), 44.5 ( $\text{CH}_2\text{CH}$ ), 52.5 ( $\text{NCH}_2\text{CH}$ ), 53.6 ( $\text{ArCH}_2\text{N}$ ), 56.2 ( $\text{ArCH}_2\text{CH}_2\text{N}$ ), 125.1 ( $\text{ArCH}$ ), 126.7 ( $\text{ArCH}$ ), 126.8 ( $\text{ArCH}$ ), 126.9 ( $\text{ArCH}$ ), 126.9 ( $\text{ArCH}$ ), 129.0 ( $\text{ArCH}$ ), 130.4 ( $\text{ArCH}$ ), 130.9 ( $\text{ArCH}$ ), 134.6 ( $\text{ArCCH}_2\text{N}$ ), 135.2 ( $\text{ArCCH}$ ), 140.8 ( $\text{ArCCH}_2\text{CH}_2$ ) and 145.0 ( $\text{ArCCH}$ ) ppm. LC/MS ( $\text{ES}^+$ )  $t_r = 0.95$  min (99 %),  $m/z$  236.0 ( $\text{M}^+ + \text{H}$ ); (RP, Isocratic, 90% MeOH). HRMS ( $\text{ES}^+$ ) calcd. for  $\text{C}_{17}\text{H}_{18}\text{N}$  ( $\text{M}^+ + \text{H}$ ) 236.1434, found 236.1441.

## 2,2-Dimethoxy-*N*-(3-methoxybenzyl)-*N*-(4-methoxybenzyl)ethanamine (22)

*m*-Anisaldehyde (1.2 mL, 10.0 mmol) and 2,2-dimethoxyethylamine (1.1 mL, 10.0 mmol) were dissolved in CHCl<sub>3</sub> (50 mL) and treated with NaBH(OAc)<sub>3</sub> (3.3 g, 15.0 mmol). After stirring for 2 h at rt, *p*-anisaldehyde (1.2 mL, 10.0 mmol) was introduced followed by NaBH(OAc)<sub>3</sub> (3.30 g, 15.0 mmol). After stirring for 6h at rt, the mixture was quenched with a saturated aqueous solution of NaHCO<sub>3</sub> and the aqueous layer was extracted with EtOAc (2 × 50 mL). The combined organics were dried with MgSO<sub>4</sub>, filtered and evaporated to give a pale green oil (3.49 g). The crude compound was purified by column chromatography to give the product as a colorless oil (2.78 g, 80%) which showed: <sup>1</sup>H NMR (500 MHz, CDCl<sub>3</sub>) δ 2.63 (2H, d, *J* = 5.2 Hz, CH<sub>2</sub>CH), 3.27 (6H, s, CH(OCH<sub>3</sub>)), 3.56 - 3.66 (4H, m, ArCH<sub>2</sub>), 3.80 (3H, s, ArOCH<sub>3</sub>), 3.81 (3H, s, ArOCH<sub>3</sub>), 4.46 (1H, t, *J* = 5.2 Hz, CH(OR)<sub>2</sub>), 6.78 (1H, dd, *J* = 2.1, 7.8 Hz, ArH), 6.85 (2H, d, *J* = 8.7 Hz, ArH), 6.95 (2H, d, *J* = 7.8 Hz, ArH), 6.97 - 6.98 (1H, m, ArH), 7.22 (1H, t, *J* = 7.8 Hz, ArH) and 7.28 (2H, d, *J* = 8.7 Hz, ArH) ppm. <sup>13</sup>C NMR (126 MHz, CDCl<sub>3</sub>) δ 53.6 CH(OCH<sub>3</sub>)<sub>2</sub>, 55.0 (CH<sub>2</sub>CH), 55.3 (ArOCH<sub>3</sub>), 55.4 (ArOCH<sub>3</sub>), 58.5 (ArCH<sub>2</sub>), 58.9 (ArCH<sub>2</sub>), 104.0 (ArCH), 112.4 (ArCH), 113.7 (ArCH), 114.5 (ArCH), 121.3 (ArCH), 129.2 (ArCH), 130.2 (ArCH), 131.6 (ArCCH<sub>2</sub>), 141.6 (ArCCH<sub>2</sub>), 158.8 (ArCOCH<sub>3</sub>) and 159.7 (ArCOCH<sub>3</sub>) ppm. LC/MS (ES<sup>+</sup>) *t*<sub>r</sub> = 1.03 min (96 %), *m/z* 346.3 (M<sup>+</sup>+H); (RP, Isocratic, 90% MeOH). HRMS (ES<sup>+</sup>) calcd. for C<sub>20</sub>H<sub>28</sub>NO<sub>4</sub> (M<sup>+</sup>+H) 346.2013, found 346.2025.

## 7-Methoxy-2-(4-methoxybenzyl)-1,2,3,4-tetrahydroisoquinolin-4-ol (24)

The compound was synthesized according to method A. The crude compound was purified by column chromatography (eluent: from 0% to 100% EtOAc in pet. ether) to give the product as a yellow oil (223 mg, 34%) which showed: <sup>1</sup>H NMR (500 MHz, CDCl<sub>3</sub>) δ 2.61 (1H, dd, *J* = 2.6, 11.6 Hz CHCH<sub>2</sub>), 2.81 (1H, bs, OH), 3.05 (1H, ddd, *J* = 1.2, 3.1, 11.6 Hz, CHCH<sub>2</sub>), 3.33 (1H, d, *J* = 15.1 Hz, ArCH<sub>2</sub> (THIQ)), 3.66 (2H, d, *J* = 5.1 Hz, ArCH<sub>2</sub>

(benzylic)), 3.76 (3H, s, CH<sub>3</sub>), 3.76 (1H, d,  $J$  = 15.1 Hz, ArCH<sub>2</sub> (THIQ)), 3.81 (3H, s, CH<sub>3</sub>), 4.56 (1H, bs), 6.53 (1H, d,  $J$  = 2.5 Hz, ArH (THIQ)), 6.79 (1H, dd,  $J$  = 2.5, 8.4 Hz, ArH (THIQ)), 6.88 (3H, d,  $J$  = 8.7 Hz, ArH (benzyl)), 7.28 (2H, d,  $J$  = 8.7 Hz, ArH (benzyl)) and 7.32 (1H, d,  $J$  = 8.4 Hz, ArH (THIQ)) ppm. <sup>13</sup>C NMR (126 MHz, CDCl<sub>3</sub>) δ 55.4 (CH<sub>3</sub>), 55.4 (CH<sub>3</sub>), 56.0 (ArCH<sub>2</sub> (THIQ)), 58.5 (CHCH<sub>2</sub>), 62.1 (ArCH<sub>2</sub> (benzyl)), 66.9 (CHCH<sub>2</sub>), 110.8 (ArCH (THIQ)), 113.3 (ArCH (THIQ)), 113.9 (ArCH (benzyl)), 129.5 (CHCH<sub>2</sub>), 129.9 (ArCH<sub>2</sub> (benzyl)), 130.3 (ArCH (benzyl)), 130.7 (ArCH (THIQ)), 136.5 (ArCH<sub>2</sub> (THIQ)), 159.0 (CH<sub>3</sub>) and 159.1 (CH<sub>3</sub>) ppm. LC/MS (ES<sup>+</sup>)  $t_r$  = 0.88 min (69 %),  $m/z$  300.0 (M<sup>+</sup>+H); (RP, Isocratic, 90% MeOH). HRMS (ES<sup>+</sup>) calcd. for C<sub>18</sub>H<sub>22</sub>NO<sub>3</sub> (M<sup>+</sup>+H) 300.1594, found 300.1587.

## **2,9-Dimethoxy-7,12-dihydro-5H-6,12-methanodibenzo[c,f]azocine (25)**

The compound was synthesized according to method A. The crude compound was purified by column chromatography (eluent: from 0% to 30% EtOAc in pet. ether) to give the product as a brown gum (181 mg, 15%) which showed: <sup>1</sup>H NMR (500 MHz, CDCl<sub>3</sub>) δ 3.35 (1H, d,  $J$  = 7.0 Hz, CHCH<sub>2</sub>), 3.62 (1H, s, ArCH), 3.72 (3H, s, CH<sub>3</sub>), 3.77 (3H, s, CH<sub>3</sub>), 3.87 (1H, d,  $J$  = 14.0 Hz, ArCH<sub>2</sub>), 3.90 (1H, d,  $J$  = 7.0 Hz, CHCH<sub>2</sub>), 3.90 (1H, d,  $J$  = 14.5 Hz, ArCH<sub>2</sub>), 4.52 (1H, d,  $J$  = 14.5 Hz, ArCH<sub>2</sub>), 4.55 (1H, d,  $J$  = 14.0 Hz, ArCH<sub>2</sub>), 6.52 (1H, d,  $J$  = 2.6 Hz, ArH), 6.63 (1H, dd,  $J$  = 2.6, 8.4 Hz, ArH), 6.66 (1H, dd,  $J$  = 2.6, 8.4 Hz, ArH), 6.75 (1H, d,  $J$  = 2.6 Hz, ArH), 6.89 (1H, d,  $J$  = 8.4 Hz, ArH) and 7.15 (1H, d,  $J$  = 8.4 Hz, ArH) ppm. <sup>13</sup>C NMR (126 MHz, CDCl<sub>3</sub>) δ 35.9 (CHCH<sub>2</sub>), 49.4 (CHCH<sub>2</sub>), 55.2 (CH<sub>3</sub>), 55.3 (CH<sub>3</sub>), 56.9 (ArCH<sub>2</sub>), 57.7 (ArCH<sub>2</sub>), 110.8 (ArCH), 111.9 (ArCH), 112.4 (ArCH), 112.5 (ArCH), 126.0 (ArCH<sub>2</sub>), 127.1 (ArCH), 128.4 (ArCH), 132.8 (ArCH), 135.5 (ArCH<sub>2</sub>), 142.1 (ArCH), 157.8 (ArCOCH<sub>3</sub>) and 157.9 (ArCOCH<sub>3</sub>) ppm. LC/MS (ES<sup>+</sup>)  $t_r$  = 0.90 min (94 %),  $m/z$  282.2 (M<sup>+</sup>+H); (RP, Isocratic, 90% MeOH). HRMS (ES<sup>+</sup>) calcd. for C<sub>18</sub>H<sub>20</sub>NO<sub>2</sub> (M<sup>+</sup>+H) 282.1489, found 282.1482.
